# Supplementary material for: Ultralight open cell polymer sponges with advanced properties by PPX CVD coating
Source: Royal Society of Chemistry journal article supplement (doi:10.1039/c6py00339g), 2016-01-01
Supplement: c6py00339g1.pdf [file c6py00339g1.pdf]

## Supplementary Information of Ultralight open cell polymer sponges with advanced properties by PPX CVD coating

Gaigai Duan, Shaohua Jiang, Tobias Moss, Seema Agarwal, and Andreas Greiner\*

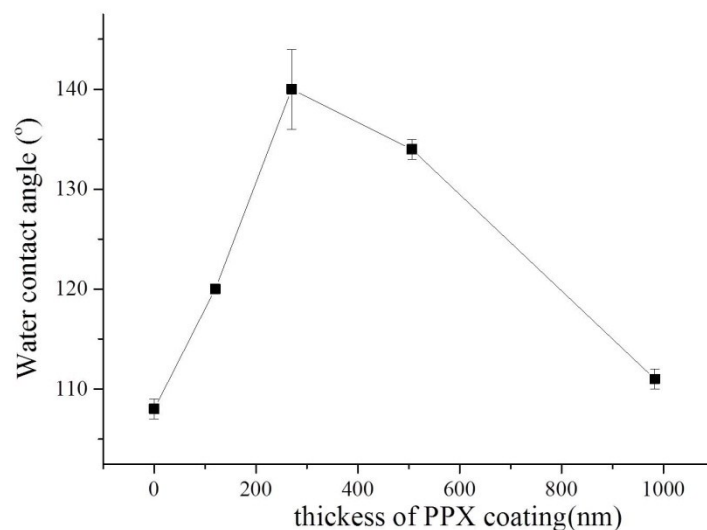

Fig.S1 water contact angle of fiber mat as a function of different thickness of PPX coating

Fig.S1 shows that the water contact angle of a fiber mat before PPX coating is  $< 110^\circ$ , but nearly  $140^\circ$  when coated with 280 nm PPX. With higher PPX coatings the water contact angle decreased if PPX layer become thicker. This trend was consistent with water contact angle of sponges before and after coating.
